# Supplementary material
Source: Springer Nature journal article supplement (https://www.springermedizin.de/resource/supplementary/12879_2011_4192_MOESM20_ESM.pdf/9444724)

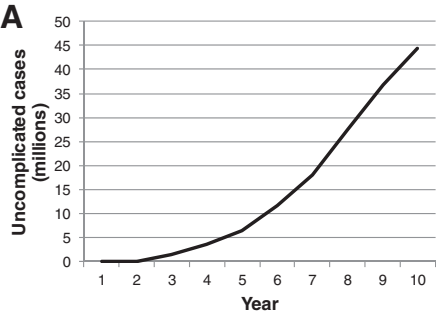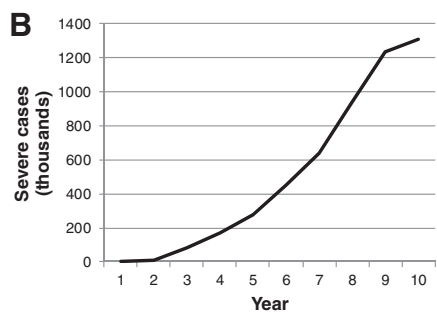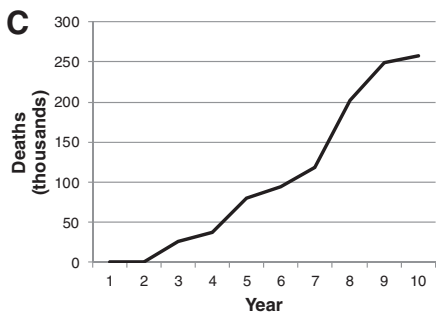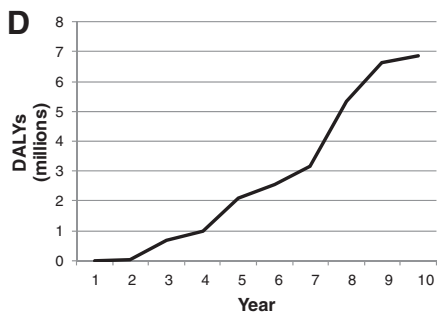

Supplement: MOESM20 [file 9444724]
